# Supplementary material for: Influence of host phylogeny, geographical location and seed harvesting diet on the bacterial community of globally distributed Pheidole ants
Source: PeerJ. 2020 Feb 4;8:e8492. doi: 10.7717/peerj.8492 (PMC7006521; doi:10.7717/peerj.8492)
Supplement: Table S1 — Sample ID, genus and species, region, continent, country of collection and food resource. [file peerj-08-8492-s003.xlsx]

## Sheet: Sheet1
Table S 1: Samples used in this study showing sample ID, genus and species, region, continent, country of collection and food resource.
#SampleID	Genus	Region	Continent	Country	Species	Food Resource
RA0155	Pheidole	Neotropical	North America	Costa Rica	absurda	seed
CS0159	Pheidole	Nearctic	North America	U.S.A.	desertorum	no_seed
CS0161	Pheidole	Nearctic	North America	U.S.A.	rheaA	seed
CS0224	Pheidole	Nearctic	North America	U.S.A.	tucsonica(syn. of gilvescens)	seed
CS0267	Pheidole	Nearctic	North America	U.S.A.	ceres	seed
CS0301	Pheidole	Nearctic	North America	U.S.A.	dentata	no_seed
CS0399	Pheidole	Neotropical	South America	Ecuador	xanthogaster	no_seed
CS0410	Pheidole	Neotropical	South America	Ecuador	astur	no_seed
CS0414	Pheidole	Neotropical	South America	Ecuador	amazonica	no_seed
CS0506	Pheidole	Neotropical	South America	Peru	cephalica	seed
CS0507	Pheidole	Neotropical	South America	Peru	cramptoni	no_seed
RA0109	Pheidole	Neotropical	South America	Ecuador	allarmata	seed
RA0113	Pheidole	Neotropical	South America	Ecuador	fissiceps	no_info
RA0116	Pheidole	Neotropical	South America	Ecuador	sospes	no_info
RA0118	Pheidole	Neotropical	South America	Guyana	mamore	no_info
RA0128	Pheidole	Neotropical	North America	Dominican Republic	moerens	no_info
RA0139	Pheidole	Nearctic	North America	U.S.A.	gilvescens	seed
RA0141	Pheidole	Nearctic	North America	U.S.A.	barbata	seed
RA0154	Pheidole	Neotropical	North America	Costa Rica	laticornis	no_info
RA0162	Pheidole	Neotropical	North America	Costa Rica	bilimeki	no_seed
RA0163	Pheidole	Neotropical	North America	Costa Rica	erratilis	no_info
RA0167	Pheidole	Neotropical	North America	Costa Rica	scrobifera	no_info
RA0168	Pheidole	Neotropical	North America	Costa Rica	truncula	no_info
RA0169	Pheidole	Nearctic	North America	U.S.A.	rugulosa	no_info
RA0170	Pheidole	Neotropical	North America	Costa Rica	indagatrix	no_seed
RA0174	Pheidole	Neotropical	North America	Costa Rica	cocciphaga	no_info
RA0175	Pheidole	Neotropical	North America	Costa Rica	innupta(syn. of alfaroi)	no_info
RA0177	Pheidole	Neotropical	North America	Costa Rica	umphreyi	no_info
RA0179	Pheidole	Neotropical	North America	Costa Rica	nitella	seed
RA0180	Pheidole	Neotropical	North America	Costa Rica	flavens	no_info
RA0181	Pheidole	Neotropical	North America	Costa Rica	rhinoceros	seed
RA0182	Pheidole	Neotropical	North America	Costa Rica	fiorii	no_info
RA0183	Pheidole	Neotropical	North America	Costa Rica	nitidicollis	no_info
RA0184	Pheidole	Neotropical	North America	Costa Rica	prostrata	no_info
RA0185	Pheidole	Neotropical	North America	Costa Rica	laselva	seed
RA0195	Pheidole	Palearctic	Europe	France	pallidula(France)	seed
RA0203	Pheidole	Nearctic	North America	U.S.A.	pilifera (pacifica)	no_info
RA0204	Pheidole	Nearctic	North America	Mexico	sciophila	no_seed
RA0218	Pheidole	Nearctic	North America	U.S.A.	obtusospinosaA	no_info
RA0244	Pheidole	Neotropical	North America	Dominican Republic	jelskii	no_info
RA0314	Pheidole	Afrotropical	Africa	Madagascar	sp.a (Madg)	no_info
RA0315	Pheidole	Afrotropical	Africa	Madagascar	sp.b (Madg)	no_info
RA0316	Pheidole	Afrotropical	Africa	Madagascar	sp.c (Madg)	no_info
RA0317	Pheidole	Afrotropical	Africa	Madagascar	sp.d (Madg)	no_info
RA0318	Pheidole	Indomalaya	Asia	Thailand	dugasi(Thailand)	no_info
RA0319	Pheidole	Indomalaya	Asia	Vietnam	gatesi(Vietnam)	no_info
RA0320	Pheidole	Indomalaya	Asia	Malaysia	quadrensis(Borneo)	no_info
RA0329	Pheidole	Australian	Australia	Australia	sp. (Aust)	no_info
RA0331	Pheidole	Nearctic	North America	U.S.A.	floridana	no_seed
RA0332	Pheidole	Nearctic	North America	U.S.A.	adrianoi	seed
RA0333	Pheidole	Nearctic	North America	U.S.A.	coloradensisA (syn. of pilifera)	seed
RA0336	Pheidole	Nearctic	North America	U.S.A.	vallicola	no_seed
RA0337	Pheidole	Nearctic	North America	U.S.A.	sitiens	no_info
RA0357	Pheidole	Australian	Australia	Australia	megacephala(Aust)	no_info
RA0380	Pheidole	Nearctic	North America	U.S.A.	cerebrosior	seed
RA0422	Pheidole	Indomalaya	Asia	Indonesia	sp.a (Indonesia)	no_info
RA0423	Pheidole	Indomalaya	Asia	Indonesia	sp.b (Indonesia)	no_info
RA0447	Pheidole	Nearctic	North America	U.S.A.	perpilosa	no_seed
RA0448	Pheidole	Nearctic	North America	U.S.A.	tysoni	seed
RA0450	Pheidole	Nearctic	North America	U.S.A.	hyatti(yellow form)	no_seed
RA0451	Pheidole	Nearctic	North America	U.S.A.	tepicana	no_info
RA0456	Pheidole	Nearctic	North America	U.S.A.	clydei	no_info
RA0461	Pheidole	Nearctic	North America	U.S.A.	cockerelli	no_seed
RA0462	Pheidole	Nearctic	North America	U.S.A.	senex	seed
RA0465	Pheidole	Nearctic	North America	U.S.A.	artemisia(syn. of pilifera)	seed
RA0466	Pheidole	Nearctic	North America	U.S.A.	soritis	seed
RA0467	Pheidole	Nearctic	North America	U.S.A.	micula	seed
RA0468	Pheidole	Nearctic	North America	U.S.A.	militicida	seed
RA0471	Pheidole	Nearctic	North America	U.S.A.	diversipilosa	no_seed
RA0473	Pheidole	Australian	Australia	Papua New Guinea	sp.a (PNG)	no_info
RA0477	Pheidole	Indomalaya	Asia	Malaysia	comata(Borneo)	no_info
RA0479	Pheidole	Indomalaya	Asia	Vietnam	noda(Vietnam)	no_info
RA0480	Pheidole	Indomalaya	Asia	Malaysia	quadricuspis(Borneo)	seed
RA0482	Pheidole	Indomalaya	Asia	Vietnam	plagiara(Vietnam)	no_info
RA0492	Pheidole	Indomalaya	Asia	Indonesia	sp. (Sumatra)	no_info
RA0494	Pheidole	Nearctic	North America	U.S.A.	xerophila	seed
RA0496	Pheidole	Nearctic	North America	U.S.A.	morrisi	no_seed
RA0516	Pheidole	Australian	Australia	Papua New Guinea	sp.b (PNG)	no_info
RA0518	Pheidole	Australian	Australia	Papua New Guinea	sp.c (PNG)	no_info
RA0519	Pheidole	Australian	Australia	Papua New Guinea	sp.d (PNG)	no_info
RA0520	Pheidole	Australian	Australia	Papua New Guinea	sp.e (PNG)	no_info
RA0524	Pheidole	Nearctic	North America	U.S.A.	metallescens	no_info
RA0525	Pheidole	Nearctic	North America	U.S.A.	pelor	no_info
RA0526	Pheidole	Nearctic	North America	U.S.A.	titanis	no_seed
RA0527	Pheidole	Nearctic	North America	U.S.A.	juniperae	no_seed
RA0528	Pheidole	Nearctic	North America	U.S.A.	hoplitica	no_info
RA0533	Pheidole	Nearctic	North America	U.S.A.	rheaA	no_info
RA0536	Pheidole	Afrotropical	Africa	Ivory Coast	sp. 5 (Ivory Coast)	no_info
RA0538	Pheidole	Afrotropical	Africa	Ivory Coast	sp. 8 (Ivory Coast)	no_info
RA0557	Pheidole	Afrotropical	Africa	Ghana	sp.a (Ghana)	no_info
RA0558	Pheidole	Afrotropical	Africa	Ghana	sp.b (Ghana)	no_info
RA0559	Pheidole	Afrotropical	Africa	Ghana	sp.c (Ghana)	no_info
RA0563	Pheidole	Afrotropical	Africa	Ghana	sp.d (Ghana)	no_info
RA0564	Pheidole	Nearctic	North America	Nicaragua	polymorpha	no_info
RA0565	Pheidole	Neotropical	North America	Guatemala	polymorphaB	no_info
RA0567	Pheidole	Nearctic	North America	U.S.A.	hyatti	no_seed
RA0568	Pheidole	Nearctic	North America	U.S.A.	casta	no_info
RA0569	Pheidole	Neotropical	North America	Dominican Republic	harlequina	no_seed
RA0570	Pheidole	Nearctic	North America	U.S.A.	constipata	no_seed
RA0572	Pheidole	Nearctic	North America	Mexico	granulata	no_info
RA0573	Pheidole	Nearctic	North America	Mexico	psammophila	seed
RA0574	Pheidole	Nearctic	North America	U.S.A.	vinelandica(syn. bicarinata)	seed
RA0575	Pheidole	Nearctic	North America	Mexico	pacifica	no_info
RA0576	Pheidole	Nearctic	North America	Mexico	clementensis	seed
RA0577	Pheidole	Nearctic	North America	U.S.A.	portalensis	no_seed
RA0578	Pheidole	Nearctic	North America	Mexico	macrops	no_info
RA0579	Pheidole	Nearctic	North America	Mexico	yaqui	seed
RA0580	Pheidole	Nearctic	North America	U.S.A.	sciara	no_info
RA0605	Pheidole	Nearctic	North America	U.S.A.	coloradensisB (syn. of pilifera)	seed
RA0606	Pheidole	Nearctic	North America	U.S.A.	inquilina	no_info
RA0610	Pheidole	Nearctic	North America	U.S.A.	furtiva	no_seed
RA0614	Pheidole	Nearctic	North America	U.S.A.	crassicornis	no_info
RA0641	Pheidole	Nearctic	North America	U.S.A.	obtusospinosaB	no_info
RA0707	Pheidole	Nearctic	North America	U.S.A.	pilifera	seed
RA0709	Pheidole	Nearctic	North America	U.S.A.	carrolli	seed
RA0710	Pheidole	Nearctic	North America	U.S.A.	littoralis	seed
RA0712	Pheidole	Oceania	Oceania	Republic of Palau	sexspinosagp. (Palau)	no_info
RA0713	Pheidole	Oceania	Oceania	Republic of Palau	oceanica(Palau)	no_seed
