# Supplementary material for: Influence of host phylogeny, geographical location and seed harvesting diet on the bacterial community of globally distributed Pheidole ants
Source: PeerJ. 2020 Feb 4;8:e8492. doi: 10.7717/peerj.8492 (PMC7006521; doi:10.7717/peerj.8492)
Supplement: Table S2 — Bacteria phylum called as others are the sum of all the listed bacteria bellow. Those correspond to the bacteria with less than 1% relative frequency each. [file peerj-08-8492-s004.xlsx]

## Sheet: Sheet1
Table S2: Relative frequency for phyla level from general bacteria (not core filtered) found in Pheidole ants. Bateria phylum called as others are the sum of all the listed bacteria bellow. Those correspond to the bacteria with less than 1% relative frequency each.
#OTU ID	CS0161	CS0224	CS0267	CS0301	CS0399	CS0410	CS0414	CS0506	CS0507	RA0109	RA0113	RA0116	RA0118	RA0128	RA0139	RA0141	RA0154	RA0155	RA0162	RA0163	RA0167	RA0168	RA0170	RA0174	RA0175	RA0177	RA0179	RA0180	RA0181	RA0182	RA0183	RA0184	RA0185	RA0195	RA0204	RA0218	RA0314	RA0315	RA0316	RA0317	RA0318	RA0319	RA0320	RA0329	RA0331	RA0332	RA0333	RA0336	RA0337
Actinobacteria	0.492124	0.0515803	0.00081785	0.0322372	0.280547	0.0545493	0.0478579	0.0177842	0.00105081	0.00990212	0.011911	0.00786007	0.0856679	0.42937	0.00485966	0.0378708	0.113891	0.0335301	0.0120847	0.145822	0.00295998	0.0239046	0.0190258	0.00283145	0.0555516	0.00552753	0.0649013	0.00775778	0.0134372	0.0428162	0.045989	0.0180327	0.0738282	0.0578261	0	0.00744481	0.117405	0.00297445	0.021203	0.0070842	0.0614969	0.000998629	0.0636425	0.0149975	0.051054	0.00250677	0.00616742	0.010878	0.0478659
Bacteroidetes	0.0106662	0.157749	0.000102231	0.031179	0.0255764	0.0148989	0.0598666	0.0054839	0.000662156	0.0205886	0.180326	0.0140574	0.0458239	0.0108739	0.0167993	0.0263349	0.0627046	0.0773444	0.020651	0.0780299	0.043492	0.00352402	0.0296236	0.00499667	0.0430203	0.00630484	0.033895	0.0156346	0.00477022	0.0354666	0.0182049	0.0209426	0.0447924	0.0420988	0.000850616	0.0718809	0.09463	0.077037	0.0169439	0.00445207	0.0720464	0.00208189	0.0761679	0.151754	0.0641033	0.000243515	0.0032122	0.0152716	0.235938
Firmicutes	0.169672	0.27769	0.00178905	0.08609	0.112488	0.010213	0.0259943	0.0102844	0.000964445	0.0405889	0.0742656	0.0570287	0.116282	0.157521	0.0688312	0.120105	0.232299	0.233311	0.0181423	0.160487	0.0266793	0.0223188	0.067455	0.00727293	0.141914	0.0342707	0.268464	0.0333128	0.0169309	0.142846	0.107414	0.0357675	0.140174	0.272482	0.0058733	0.0337441	0.309284	0.00870605	0.0219129	0.0163643	0.274686	0.0114419	0.355586	0.0661994	0.340118	0.00727679	0.0870077	0.0116833	0.0525373
Fusobacteria	0	0.212617	0	0	0.00548806	0	0.00365868	0	0	0.00189546	0	0	0	0	0	0	0.0179702	0	0	0.00138351	0.00098666	0	0	0.00038863	0.00135666	0.00134734	0.022051	0.0013095	0	0.015943	0.0039043	0	0.00183332	0.0658433	0	0	0	0	0.00166662	0.00237644	0.00614969	0	0	0	0.00487954	0	0.00154185	0	0
Proteobacteria	0.311292	0.272355	0.996243	0.82784	0.416506	0.909435	0.823233	0.949483	0.997323	0.903936	0.655199	0.908637	0.70273	0.402235	0.875136	0.801714	0.540636	0.647904	0.932632	0.614278	0.925882	0.947874	0.859555	0.968771	0.726098	0.948266	0.567935	0.932184	0.959997	0.618084	0.794343	0.92127	0.721782	0.531114	0.993276	0.880826	0.470884	0.911283	0.897071	0.969723	0.533723	0.985478	0.489032	0.767049	0.513133	0.98685	0.902071	0.955951	0.660203
Tenericutes	0	0.0062343	0	0	0	0	0	0	0	0	0.00863664	0	0	0	0	0	0.0125935	0	0	0	0	0	0	0	0	0	0	0	0	0	0	0	0	0	0	0	0	0	0	0	0	0	0	0	0.0225017	0	0	0	0
Others*	0.0162459	0.0217735	0.00104787	0.0226542	0.159395	0.0109038	0.0393898	0.0169642	0	0.0230886	0.0696626	0.0124163	0.0494963	0	0.0343737	0.013975	0.0199058	0.00791091	0.0164902	0	0	0.00237871	0.0243404	0.0157395	0.03206	0.00428384	0.042754	0.00980139	0.00486428	0.144844	0.0301448	0.00398689	0.0175899	0.0306359	0	0.00610417	0.00779756	0	0.0412024	0	0.0518974	0	0.0155721	0	0.00421035	0.00312272	0	0.00621601	0.00345556
*List of Phyla included in category 'Others'.
D_0__Bacteria;D_1__WPS-2	0	0	0	0.00080348	0.00465967	0	0.00357016	0	0	0	0	0	0.00360741	0	0.00140344	0	0.00470763	0	0.0131861	0	0	0	0.000471713	0	0	0	0	0	0	0	0.00267853	0	0	0	0	0	0	0	0	0	0	0	0	0	0	0	0	0	0
D_0__Bacteria;NA	0	0	0	0	0.00151871	0	0	0	0	0.00699358	0	0	0	0	0	0	0	0	0	0	0	0	0	0	0.00324884	0	0	0	0	0	0.00603804	0	0	0	0	0	0	0	0	0	0	0	0	0	0	0	0	0	0
Unassigned;NA	0	0	0	0.00699616	0.083667	0.00327416	0	0	0	0.00996748	0.0696626	0.0122004	0	0	0	0	0.00750352	0	0	0	0	0	0.00506305	0.0132967	0.00521242	0.00186554	0.0110737	0	0.00228433	0.132745	0	0	0	0	0	0.00610417	0.00779756	0	0	0	0	0	0.0127962	0	0	0.00312272	0	0.00380024	0
D_0__Bacteria;D_1__FBP	0	0	0	0	0	0	0	0	0	0	0	0	0	0	0	0	0	0	0	0	0	0	0	0	0	0	0	0	0	0	0	0	0	0	0	0	0	0	0	0	0	0	0	0	0	0	0	0	0
D_0__Bacteria;D_1__RsaHF231	0	0.00266741	0	0	0	0	0	0	0	0	0	0	0	0	0	0	0	0	0	0	0	0	0.000754741	0	0.00449839	0	0	0	0	0	0	0	0	0	0	0	0	0	0	0	0	0	0	0	0	0	0	0	0
D_0__Archaea;D_1__Nanoarchaeaeota	0	0	0	0	0	0	0	0	0	0	0	0	0	0	0	0	0	0	0	0	0	0	0	0	0	0	0	0	0	0	0	0	0	0	0	0	0	0	0	0	0	0	0	0	0	0	0	0	0
D_0__Archaea;D_1__Thaumarchaeota	0.00450076	0	0	0	0	0.00288366	0	0	0	0	0	0	0	0	0	0	0.0028198	0	0	0	0	0	0	0	0	0	0	0	0	0	0	0	0	0	0	0	0	0	0	0	0	0	0	0	0	0	0	0.000734619	0.000319959
D_0__Bacteria;D_1__Armatimonadetes	0	0	0	0	0	0	0	0	0	0	0	0	0	0	0	0	0	0	0	0	0	0	0	0	0	0	0	0	0	0	0	0	0	0	0	0	0	0	0.00521589	0	0	0	0	0	0	0	0	0	0
D_0__Bacteria;D_1__Chlamydiae	0	0	0	0	0	0	0	0	0	0	0	0	0	0	0	0	0	0	0	0	0	0	0	0	0	0	0	0	0	0	0.00292822	0	0.00659003	0	0	0	0	0	0	0	0	0	0	0	0	0	0	0	0
D_0__Bacteria;D_1__Chloroflexi	0.00326767	0	0	0	0	0	0.00144577	0	0	0	0	0	0	0	0	0	0.00305876	0	0	0	0	0	0	0	0	0	0	0	0	0	0	0	0	0	0	0	0	0	0	0	0	0	0	0	0	0	0	0	0
D_0__Bacteria;D_1__Cyanobacteria	0	0.00455941	0.00104787	0.0100729	0.0501864	0.00474603	0.0102384	0	0	0.00612755	0	0.000215936	0	0	0.0329703	0.013975	0	0.00791091	0	0	0	0.00237871	0.0113526	0.00244282	0.0143163	0.0024183	0.0316803	0.00545624	0.00257995	0.00697271	0.00224724	0.0015581	0.00178377	0.00648199	0	0	0	0	0.00462949	0	0	0	0.0027759	0	0	0	0	0	0
D_0__Bacteria;D_1__Deinococcus-Thermus	0	0	0	0	0	0	0	0	0	0	0	0	0	0	0	0	0	0	0	0	0	0	0	0	0.00478401	0	0	0	0	0	0	0	0	0.00453739	0	0	0	0	0	0	0	0	0	0	0.00100379	0	0	0	0
D_0__Bacteria;D_1__Dependentiae	0	0	0	0	0.00269225	0	0	0	0	0	0	0	0	0	0	0	0	0	0	0	0	0	0	0	0	0	0	0.00216266	0	0	0.00342761	0	0	0	0	0	0	0	0	0	0	0	0	0	0	0	0	0.00168115	0
D_0__Bacteria;D_1__Elusimicrobia	0	0	0	0	0	0	0	0	0	0	0	0	0	0	0	0	0	0	0	0	0	0	0	0	0	0	0	0	0	0	0	0	0	0	0	0	0	0	0	0	0	0	0	0	0	0	0	0	0
D_0__Bacteria;D_1__Entotheonellaeota	0	0	0	0	0	0	0	0	0	0	0	0	0	0	0	0	0	0	0	0	0	0	0	0	0	0	0	0	0	0	0	0	0	0	0	0	0	0	0	0	0	0	0	0	0	0	0	0	0
D_0__Bacteria;D_1__Epsilonbacteraeota	0	0	0	0	0	0	0	0	0	0	0	0	0	0	0	0	0.00181614	0	0	0	0	0	0.00106922	0	0	0	0	0	0	0	0	0	0	0	0	0	0	0	0	0	0	0	0	0	0	0	0	0	0
D_0__Bacteria;D_1__Gemmatimonadetes	0	0.00077541	0	0	0	0	0	0	0	0	0	0	0	0	0	0	0	0	0	0	0	0	0	0	0	0	0	0	0	0	0	0	0	0	0	0	0	0	0	0	0	0	0	0	0	0	0	0	0
D_0__Bacteria;D_1__Nitrospirae	0	0	0	0	0	0	0	0	0	0	0	0	0	0	0	0	0	0	0	0	0	0	0	0	0	0	0	0	0	0	0	0	0	0	0	0	0	0	0	0	0	0	0	0	0	0	0	0	0
D_0__Bacteria;D_1__Patescibacteria	0	0.00409417	0	0.0019989	0	0	0.00655022	0	0	0	0	0	0	0	0	0	0	0	0	0	0	0	0	0	0	0	0	0	0	0	0	0	0	0	0	0	0	0	0	0	0	0	0	0	0	0	0	0	0
D_0__Bacteria;D_1__Planctomycetes	0	0	0	0	0.00355516	0	0.010917	0	0	0	0	0	0.0116997	0	0	0	0	0	0	0	0	0	0	0	0	0	0	0.0021825	0	0	0.00363191	0	0.00921613	0	0	0	0	0	0	0	0	0	0	0	0	0	0	0	0
D_0__Bacteria;D_1__Rokubacteria	0	0	0	0	0	0	0	0	0	0	0	0	0	0	0	0	0	0	0	0	0	0	0	0	0	0	0	0	0	0	0	0	0	0	0	0	0	0	0	0	0.00454977	0	0	0	0	0	0	0	0
D_0__Bacteria;D_1__Spirochaetes	0	0.00334977	0	0	0	0	0	0	0	0	0	0	0	0	0	0	0	0	0.00330417	0	0	0	0.00562911	0	0	0	0	0	0	0	0	0	0	0.0196165	0	0	0	0	0	0	0	0	0	0	0	0	0	0	0
D_0__Bacteria;D_1__Synergistetes	0	0	0	0	0	0	0	0	0	0	0	0	0	0	0	0	0	0	0	0	0	0	0	0	0	0	0	0	0	0	0	0	0	0	0	0	0	0	0	0	0	0	0	0	0	0	0	0	0
D_0__Bacteria;D_1__Verrucomicrobia	0.00271278	0.00632735	0	0.00278279	0.00866354	0	0	0	0	0	0	0	0	0	0	0	0	0	0	0	0	0	0	0	0	0	0	0	0	0	0	0	0	0	0	0	0	0	0.0111108	0	0.0234988	0	0	0	0	0	0	0	0.0031356
D_0__Archaea;D_1__Euryarchaeota	0	0	0	0	0	0	0	0	0	0	0	0	0	0	0	0	0	0	0	0	0	0	0	0	0	0	0	0	0	0	0	0	0	0	0	0	0	0	0	0	0	0	0	0	0	0	0	0	0
D_0__Bacteria;D_1__Acidobacteria	0.00576467	0	0	0	0.00445257	0	0.00666824	0.0169642	0	0	0	0	0.0341891	0	0	0	0	0	0	0	0	0	0	0	0	0	0	0	0	0.00512589	0.00919326	0.0024288	0	0	0	0	0	0	0.0202463	0	0.0238488	0	0	0	0.00320656	0	0	0	0
[truncated: 57 more columns]
