# Supplementary material for: Influence of host phylogeny, geographical location and seed harvesting diet on the bacterial community of globally distributed Pheidole ants
Source: PeerJ. 2020 Feb 4;8:e8492. doi: 10.7717/peerj.8492 (PMC7006521; doi:10.7717/peerj.8492)
Supplement: Table S6 — Food resource used based on Moreau (2008) and location (New ×Old World) are indicated for each sample. [file peerj-08-8492-s008.xlsx]

## Sheet: Sheet1
Table S6: qPCR data avaraged, standard deviation and log10. Food resource used based on Moreau (2008) and location (New x Old World) are indicated for each sample.
Sample	AVERAGE	STDEV	Food_Resource	log10	New_Old_World
RA0155	125.606	7.25905	seed	2.09901	New_World
CS0414	218.991	10.1522	no_seed	2.34043	New_World
RA0139	191.322		seed	2.28176	New_World
CS0159	132.155	13.2864	no_seed	2.12108	New_World
CS0506	1008.05	488.338	seed	3.00348	New_World
RA0141	31.2498	7.13412	seed	1.49485	New_World
CS0161	877.373	55.2902	seed	2.94318	New_World
CS0507	8701.98	1995.3	no_seed	3.93962	New_World
RA0154	73.2762	7.85451	no_info	1.86496	New_World
CS0224	156.731	12.7625	seed	2.19515	New_World
RA0109	409.392	91.0863	seed	2.61214	New_World
RA0162	95.9896	18.2246	no_seed	1.98222	New_World
CS0267	7264.26	491.809	seed	3.86119	New_World
RA0113	1431.97	180.751	no_info	3.15593	New_World
RA0163	112.876	27.5692	no_info	2.0526	New_World
CS0301	531.911	84.747	no_seed	2.72584	New_World
RA0116	1436.41	592.326	no_info	3.15728	New_World
RA0167	128.78	51.0563	no_info	2.10985	New_World
CS0399	508.85	55.1304	no_seed	2.70659	New_World
RA0118	603.847	78.8889	no_info	2.78093	New_World
RA0168	701.702	243.838	no_info	2.84615	New_World
CS0410	162.101	33.9432	no_seed	2.20979	New_World
RA0128	865.576	430.346	no_info	2.93731	New_World
RA0170	1516.08	391.045	no_seed	3.18072	New_World
RA0183	563.976	507.044	no_info	2.75126	New_World
RA0174	1404.12	618.28	no_info	3.1474	New_World
RA0184	485.99	130.144	no_info	2.68663	New_World
RA0315	490.28	32.2729	no_info	2.69044	Old_World
RA0175	278.408	77.1675	no_info	2.44468	New_World
RA0185	402.616	84.5866	seed	2.60489	New_World
RA0316	706.609	553.1	no_info	2.84918	Old_World
RA0177	1177.14	107.768	no_info	3.07083	New_World
RA0195	235.577	31.9644	seed	2.37213	Old_World
RA0317	486.833	2.80717	no_info	2.68738	Old_World
RA0179	243.384	86.4913	seed	2.38629	New_World
RA0318	183.914	180.464	no_info	2.26461	Old_World
RA0180	1203.61	247.62	no_info	3.08049	New_World
RA0204	5506.92	927.367	no_seed	3.74091	New_World
RA0319	4595.44	2796.75	no_info	3.66233	Old_World
RA0181	1050.97	308.684	seed	3.02159	New_World
RA0218	239.336	56.3752	no_info	2.37901	New_World
RA0320	109.24	82.5346	no_info	2.03838	Old_World
RA0182	738.267	208.592	no_info	2.86821	New_World
RA0329	546.109		no_info	2.73728	Old_World
RA0331	467.132	57.1565	no_seed	2.66944	New_World
RA0423	1420.61		no_info	3.15248	Old_World
RA0332	915.803	142.408	seed	2.9618	New_World
RA0447	398.323	253.755	no_seed	2.60024	New_World
RA0466	2386.68	211.36	seed	3.37779	New_World
RA0333	40.0668	57.9213	seed	1.60278	New_World
RA0448	298.173	58.3503	seed	2.47447	New_World
RA0467	507.895	116.752	seed	2.70577	New_World
RA0336	650.894	124.761	no_seed	2.81351	New_World
RA0450	423.593	81.6425	no_seed	2.62695	New_World
RA0468	434.84		seed	2.63833	New_World
RA0337	233.943	123.21	no_info	2.36911	New_World
RA0471	475.988	214.998	no_seed	2.6776	New_World
RA0357	121.94	20.9635	no_info	2.08614	Old_World
RA0456	932.276	174.185	no_seed	2.96954	New_World
RA0473	749.054	88.2632	no_info	2.87451	Old_World
RA0380	1290.21	173.726	seed	3.11066	New_World
RA0461	601.229	67.4629	no_seed	2.77904	New_World
RA0477	1187.16	540.429	no_info	3.07451	Old_World
RA0422	123.841	29.2986	no_info	2.09286	Old_World
RA0462	378.156		seed	2.57767	New_World
RA0480	612.065	64.2738	seed	2.7868	Old_World
RA0520	904.675	56.3135	no_info	2.95649	Old_World
RA0538	79.8822	15.7786	no_info	1.90245	Old_World
RA0482	18039.5	1802.98	no_info	4.25623	Old_World
RA0557	3606.04	859.41	no_info	3.55703	Old_World
RA0492	7882.63	1664.58	no_info	3.89667	Old_World
RA0558	6142.4	2194.82	no_info	3.78834	Old_World
RA0494	807.456	75.139	seed	2.90712	New_World
RA0526	956.786	10.894	no_seed	2.98081	New_World
RA0559	1715.94	100.324	no_info	3.2345	Old_World
RA0496	8.19955	2.06248	no_seed	0.91379	New_World
RA0527	581.036	97.0819	no_seed	2.7642	New_World
RA0563	184.198	35.5697	no_info	2.26529	Old_World
RA0516	1247.51	220.981	no_info	3.09605	Old_World
RA0528	879.161	162.139	no_info	2.94407	New_World
RA0518	152.4	9.97141	no_info	2.18299	Old_World
RA0565	1036.63	86.882	no_info	3.01562	New_World
RA0519	254.291	43.1074	no_info	2.40533	Old_World
RA0536	544.56	12.0132	no_info	2.73605	Old_World
RA0567	688.388	82.9316	no_seed	2.83783	New_World
RA0568	262.366	6.52731	no_info	2.41891	New_World
RA0577	9218.52	320.363	no_seed	3.96466	New_World
RA0641	2127.83	859.189	no_info	3.32794	New_World
RA0569	105399	10561	no_seed	5.02284	New_World
RA0578	819.667	143.223	no_info	2.91364	New_World
RA0707	744.3	15.3348	seed	2.87175	New_World
RA0570	392.655	132.178	no_seed	2.59401	New_World
RA0579	254.104	54.2856	seed	2.40501	New_World
RA0709	821.361	100.461	seed	2.91453	New_World
RA0572	59.8069	7.77197	no_info	1.77675	New_World
RA0580	478.876	135.398	no_info	2.68022	New_World
RA0710	3372.83	604.321	seed	3.52799	New_World
RA0573	310.584	62.0756	seed	2.49218	New_World
RA0605	738.435	122.211	seed	2.86831	New_World
RA0712	276.02	57.1787	no_info	2.44094	Old_World
RA0574	151.481	14.4185	seed	2.18036	New_World
RA0606	19905.1	1185.93	no_info	4.29896	New_World
RA0713	182.47	22.4977	no_seed	2.26119	Old_World
RA0610	4.9561	1.57986	no_seed	0.69514	New_World
RA0576	1741.87	110.931	seed	3.24102	New_World
