# Supplementary material for: Influence of host phylogeny, geographical location and seed harvesting diet on the bacterial community of globally distributed Pheidole ants
Source: PeerJ. 2020 Feb 4;8:e8492. doi: 10.7717/peerj.8492 (PMC7006521; doi:10.7717/peerj.8492)
Supplement: Table S7 — S7.1: Kruskal Wallis pairwise data for sample grouped for food resource. S7.2: regions. S7.3: Old World and New World samples. S7.4: Shannon index for each sample and categorical used from ‘core’ microbiota. S7.5: Kruskal Wallis pairwise data for sample grouped for food resource from ‘core’ microbiota. S7.6: regions. S7.7: Old World and New World samples. [file peerj-08-8492-s009.xlsx]

## Sheet: Shannon index general
Table S7: Shannon index for each sample and categorical used.
Sample_id	Region	Food_Resource	New_Old	Shannon
RA0113	Neotropical	no_info	New_World	4.75972
RA0116	Neotropical	no_info	New_World	2.08449
RA0118	Neotropical	no_info	New_World	5.71182
RA0128	Neotropical	no_info	New_World	4.20006
RA0154	Neotropical	no_info	New_World	5.57499
RA0163	Neotropical	no_info	New_World	4.20362
RA0167	Neotropical	no_info	New_World	2.47689
RA0168	Neotropical	no_info	New_World	2.74424
RA0174	Neotropical	no_info	New_World	1.46956
RA0175	Neotropical	no_info	New_World	5.2838
RA0177	Neotropical	no_info	New_World	2.87137
RA0180	Neotropical	no_info	New_World	2.53767
RA0182	Neotropical	no_info	New_World	4.50274
RA0183	Neotropical	no_info	New_World	4.23772
RA0184	Neotropical	no_info	New_World	2.18066
RA0218	Nearctic	no_info	New_World	2.82527
RA0314	Afrotropical	no_info	Old_World	6.05509
RA0315	Afrotropical	no_info	Old_World	3.93862
RA0316	Afrotropical	no_info	Old_World	3.49457
RA0317	Afrotropical	no_info	Old_World	1.98897
RA0318	Indomalaya	no_info	Old_World	5.43189
RA0319	Indomalaya	no_info	Old_World	1.81566
RA0320	Indomalaya	no_info	Old_World	5.18674
RA0329	Australian	no_info	Old_World	4.22604
RA0337	Nearctic	no_info	New_World	4.55716
RA0357	Australian	no_info	Old_World	3.80034
RA0422	Indomalaya	no_info	Old_World	5.22595
RA0423	Indomalaya	no_info	Old_World	2.91854
RA0473	Australian	no_info	Old_World	2.6009
RA0477	Indomalaya	no_info	Old_World	4.24426
RA0479	Indomalaya	no_info	Old_World	5.03604
RA0482	Indomalaya	no_info	Old_World	1.75065
RA0492	Indomalaya	no_info	Old_World	1.41578
RA0516	Australian	no_info	Old_World	2.94004
RA0518	Australian	no_info	Old_World	3.93545
RA0519	Australian	no_info	Old_World	4.96437
RA0520	Australian	no_info	Old_World	2.81803
RA0528	Nearctic	no_info	New_World	5.19972
RA0536	Afrotropical	no_info	Old_World	3.85254
RA0538	Afrotropical	no_info	Old_World	4.08739
RA0557	Afrotropical	no_info	Old_World	1.44464
RA0558	Afrotropical	no_info	Old_World	1.68136
RA0559	Afrotropical	no_info	Old_World	3.5517
RA0563	Afrotropical	no_info	Old_World	4.39309
RA0565	Neotropical	no_info	New_World	5.65471
RA0568	Nearctic	no_info	New_World	4.14256
RA0572	Nearctic	no_info	New_World	5.18462
RA0578	Nearctic	no_info	New_World	5.58267
RA0580	Nearctic	no_info	New_World	2.35389
RA0606	Nearctic	no_info	New_World	2.03368
RA0641	Nearctic	no_info	New_World	1.4624
RA0712	Oceania	no_info	Old_World	1.40995
CS0301	Nearctic	no_seed	New_World	2.76418
CS0399	Neotropical	no_seed	New_World	5.89458
CS0410	Neotropical	no_seed	New_World	3.17692
CS0414	Neotropical	no_seed	New_World	3.90658
CS0507	Neotropical	no_seed	New_World	1.54726
RA0162	Neotropical	no_seed	New_World	2.60624
RA0170	Neotropical	no_seed	New_World	2.79742
RA0204	Nearctic	no_seed	New_World	1.13299
RA0331	Nearctic	no_seed	New_World	5.01597
RA0336	Nearctic	no_seed	New_World	1.93833
RA0447	Nearctic	no_seed	New_World	1.92282
RA0450	Nearctic	no_seed	New_World	3.47178
RA0456	Nearctic	no_seed	New_World	1.27056
RA0461	Nearctic	no_seed	New_World	2.30542
RA0471	Nearctic	no_seed	New_World	2.98915
RA0526	Nearctic	no_seed	New_World	4.30518
RA0527	Nearctic	no_seed	New_World	3.0714
RA0567	Nearctic	no_seed	New_World	4.42428
RA0569	Neotropical	no_seed	New_World	0.0405292
RA0570	Nearctic	no_seed	New_World	4.98941
RA0577	Nearctic	no_seed	New_World	0.157415
RA0610	Nearctic	no_seed	New_World	3.08243
RA0713	Oceania	no_seed	Old_World	5.19521
RA0155	Neotropical	seed	New_World	4.88865
CS0161	Nearctic	seed	New_World	6.42903
CS0224	Nearctic	seed	New_World	6.29557
CS0267	Nearctic	seed	New_World	1.08226
CS0506	Neotropical	seed	New_World	2.03479
RA0109	Neotropical	seed	New_World	3.19076
RA0139	Nearctic	seed	New_World	3.2292
RA0141	Nearctic	seed	New_World	4.81074
RA0179	Neotropical	seed	New_World	5.06662
RA0181	Neotropical	seed	New_World	1.76996
RA0185	Neotropical	seed	New_World	5.0556
RA0195	Palearctic	seed	Old_World	5.56051
RA0332	Nearctic	seed	New_World	1.17553
RA0333	Nearctic	seed	New_World	2.98646
RA0380	Nearctic	seed	New_World	2.29052
RA0448	Nearctic	seed	New_World	2.7757
RA0462	Nearctic	seed	New_World	1.84081
RA0465	Nearctic	seed	New_World	3.01962
RA0466	Nearctic	seed	New_World	5.77002
RA0467	Nearctic	seed	New_World	2.50304
RA0468	Nearctic	seed	New_World	5.01128
RA0480	Indomalaya	seed	Old_World	2.6427
RA0494	Nearctic	seed	New_World	3.8443
RA0573	Nearctic	seed	New_World	3.8254
RA0574	Nearctic	seed	New_World	5.35246
RA0576	Nearctic	seed	New_World	4.64564
RA0579	Nearctic	seed	New_World	3.16148
RA0605	Nearctic	seed	New_World	2.08405
RA0707	Nearctic	seed	New_World	2.44695
RA0709	Nearctic	seed	New_World	1.55642
RA0710	Nearctic	seed	New_World	1.91885

## Sheet: Kruskal Wallis pairwise food re
Table S7.1: Kruskal Wallis pairwise data for sample grouped for food resource.
Group 1	Group 2	H	p-value	q-value
no_info (n=52)	no_seed (n=23)	2.370533356803378	0.12364480091926533	0.370934402757796
no_info (n=52)	seed (n=31)	0.1417936901808048	0.7065043130295487	0.7065043130295487
no_seed (n=23)	seed (n=31)	0.9089124059671292	0.3404031541747368	0.5106047312621053

## Sheet: Kruskal Wallis pairwise Region
Table S7.2: Kruskal Wallis pairwise data for sample grouped for region.
Group 1	Group 2	H	p-value	q-value
Afrotropical (n=10)	Australian (n=7)	0.03809523809523796	0.8452520242196516	1.0
Afrotropical (n=10)	Indomalaya (n=10)	0.09142857142856542	0.7623688184698474	1.0
Afrotropical (n=10)	Nearctic (n=47)	0.127219369038869	0.7213326951877053	1.0
Afrotropical (n=10)	Neotropical (n=29)	0.14896551724137908	0.6995259135934155	1.0
Afrotropical (n=10)	Oceania (n=2)	0.04615384615384954	0.8298963832086482	1.0
Afrotropical (n=10)	Palearctic (n=1)	1.6000000000000014	0.20590321073206447	0.7878075833743153
Australian (n=7)	Indomalaya (n=10)	0.03809523809523796	0.8452520242196516	1.0
Australian (n=7)	Nearctic (n=47)	0.366233766233762	0.54506437969516	1.0
Australian (n=7)	Neotropical (n=29)	0.019571295433365776	0.8887410191404094	1.0
Australian (n=7)	Oceania (n=2)	0.0	1.0	1.0
Australian (n=7)	Palearctic (n=1)	2.333333333333332	0.1266304579476157	0.7878075833743153
Indomalaya (n=10)	Nearctic (n=47)	0.19413059427731127	0.6595007669552152	1.0
Indomalaya (n=10)	Neotropical (n=29)	0.0	1.0	1.0
Indomalaya (n=10)	Oceania (n=2)	0.18461538461538396	0.667436491709883	1.0
Indomalaya (n=10)	Palearctic (n=1)	2.5	0.11384629800665763	0.7878075833743153
Nearctic (n=47)	Neotropical (n=29)	0.6176882545187823	0.4319076444396459	1.0
Nearctic (n=47)	Oceania (n=2)	0.0025531914893406338	0.9597007484069389	1.0
Nearctic (n=47)	Palearctic (n=1)	1.9813287016934282	0.1592505007756551	0.7878075833743153
Neotropical (n=29)	Oceania (n=2)	0.10344827586206407	0.7477301646241403	1.0
Neotropical (n=29)	Palearctic (n=1)	1.471635150166847	0.22508788096409008	0.7878075833743153
Oceania (n=2)	Palearctic (n=1)	1.5	0.22067136191984324	0.7878075833743153

## Sheet: Kruskal Wallis pairwise Old_New
Table S7.3: Kruskal Wallis pairwise data for sample grouped for Old World and New World sample.
Group 1	Group 2	H	p-value	q-value
New_World (n=76)	Old_World (n=30)	0.29926217412690903	0.5843453414143562	0.5843453414143562

## Sheet: Shannon index core
Table S7.4: Shannon index for each sample and categorical used from 'core' microbiota.
id	Region	Food Resource	New_Old	shannon
RA0155	Neotropical	seed	New_World	3.06887653185262
CS0224	Nearctic	seed	New_World	3.27060649910716
CS0399	Neotropical	no_seed	New_World	3.27263207535598
RA0109	Neotropical	seed	New_World	2.93654766432053
RA0113	Neotropical	no_info	New_World	2.70699306330267
RA0116	Neotropical	no_info	New_World	3.06299343607473
RA0118	Neotropical	no_info	New_World	3.09387376974821
RA0139	Nearctic	seed	New_World	2.86563655618755
RA0141	Nearctic	seed	New_World	2.92310236230877
RA0154	Neotropical	no_info	New_World	3.00974756533347
RA0175	Neotropical	no_info	New_World	3.18127003139701
RA0182	Neotropical	no_info	New_World	3.08220873025987
RA0185	Neotropical	seed	New_World	3.34709146512395
RA0218	Nearctic	no_info	New_World	2.77905167486351
RA0314	Afrotropical	no_info	Old_World	3.61520227167939
RA0315	Afrotropical	no_info	Old_World	2.43485824784134
RA0320	Indomalaya	no_info	Old_World	3.07705342777896
RA0331	Nearctic	no_seed	New_World	2.80503434504931
RA0337	Nearctic	no_info	New_World	3.07196797166795
RA0357	Australian	no_info	Old_World	2.86148347478558
RA0422	Indomalaya	no_info	Old_World	2.3467063055689
RA0450	Nearctic	no_seed	New_World	1.70565130681868
RA0468	Nearctic	seed	New_World	2.86764474147827
RA0471	Nearctic	no_seed	New_World	2.37210801900384
RA0477	Indomalaya	no_info	Old_World	2.82790590682884
RA0479	Indomalaya	no_info	Old_World	2.85334125760312
RA0494	Nearctic	seed	New_World	3.19964753760071
RA0518	Australian	no_info	Old_World	2.30904661024791
RA0519	Australian	no_info	Old_World	2.10389053606121
RA0526	Nearctic	no_seed	New_World	2.29970729456027
RA0528	Nearctic	no_info	New_World	2.50207252455076
RA0536	Afrotropical	no_info	Old_World	2.06688275811218
RA0538	Afrotropical	no_info	Old_World	2.25602272548834
RA0563	Afrotropical	no_info	Old_World	1.76977982555452
RA0565	Neotropical	no_info	New_World	3.03083847728512
RA0567	Nearctic	no_seed	New_World	2.0958010068938
RA0568	Nearctic	no_info	New_World	2.3322660636888
RA0570	Nearctic	no_seed	New_World	2.32895272013448
RA0572	Nearctic	no_info	New_World	2.81044085880484
RA0573	Nearctic	seed	New_World	1.95676834450013
RA0574	Nearctic	seed	New_World	2.74002145260556
RA0576	Nearctic	seed	New_World	2.64275342250612
RA0578	Nearctic	no_info	New_World	2.65164366712922
RA0579	Nearctic	seed	New_World	2.56910872526901
RA0610	Nearctic	no_seed	New_World	2.16326943095221

## Sheet: Kruskal Wallis core pairw food
																				Table S7.5: Kruskal Wallis pairwise data for sample grouped for food resource from 'core' microbiota..
																				Group 1	Group 2	H	p-value	q-value
																				no_info (n=25)	no_seed (n=8)	3.2629411764705765	0.07086192111570934	0.10629288167356402
																				no_info (n=25)	seed (n=12)	1.2894736842105203	0.25614496660352437	0.25614496660352437
																				no_seed (n=8)	seed (n=12)	4.666666666666657	0.03075356125927476	0.09226068377782429

## Sheet: Kruskal Wallis core pair Region
Table S7.6: Kruskal Wallis pairwise data for sample grouped for region from 'core' microbiota.
Group 1	Group 2	H	p-value	q-value
Afrotropical (n=5)	Australian (n=3)	0.19999999999999574	0.6547208460185803	0.6547208460185803
Afrotropical (n=5)	Indomalaya (n=4)	1.5	0.22067136191984324	0.36105545793310223
Afrotropical (n=5)	Nearctic (n=22)	1.2623376623376714	0.2612090664259345	0.36105545793310223
Afrotropical (n=5)	Neotropical (n=11)	3.494117647058829	0.06158721940935912	0.16894315763967527
Australian (n=3)	Indomalaya (n=4)	1.125	0.2888443663464818	0.36105545793310223
Australian (n=3)	Nearctic (n=22)	0.5664335664335738	0.45167961272925805	0.5018662363658423
Australian (n=3)	Neotropical (n=11)	5.824242424242428	0.015806774607302235	0.07903387303651117
Indomalaya (n=4)	Nearctic (n=22)	1.1363636363636402	0.28642202277785495	0.36105545793310223
Indomalaya (n=4)	Neotropical (n=11)	3.3409090909091006	0.06757726305587011	0.16894315763967527
Nearctic (n=22)	Neotropical (n=11)	11.813320369470091	0.0005880846095000743	0.005880846095000743

## Sheet: Kruskal Wallis core pair OldNew
Table S X.3: Kruskal Wallis pairwise data for sample grouped for Old World and New World sample.
Group 1	Group 2	H	p-value	q-value
New_World (n=33)	Old_World (n=12)	2.2160737812911577	0.13658000393689113	0.13658000393689113
