# Supplementary material for: Influence of host phylogeny, geographical location and seed harvesting diet on the bacterial community of globally distributed Pheidole ants
Source: PeerJ. 2020 Feb 4;8:e8492. doi: 10.7717/peerj.8492 (PMC7006521; doi:10.7717/peerj.8492)
Supplement: Table S8 — S8.1: Kruskal Wallis pairwise data for sample grouped for food resource. S8.2: regions. S8.3: Old World and New World. S8.4: Number of observed OTU for each sample for ‘core’ microbiota. S8.5: Kruskal Wallis pairwise data for sample grouped for food resource for ‘core’ microbiota. S8.6: regions. S8.7: Old World and New World samples. [file peerj-08-8492-s010.xlsx]

## Sheet: Observed OTU
Figure S8: Number of observed OTU for each sample.
id	Region	Food Resource	New_Old	observed_otus
RA0155	Neotropical	seed	New_World	67
CS0161	Nearctic	seed	New_World	153
CS0224	Nearctic	seed	New_World	142
CS0267	Nearctic	seed	New_World	14
CS0301	Nearctic	no_seed	New_World	72
CS0399	Neotropical	no_seed	New_World	109
CS0410	Neotropical	no_seed	New_World	48
CS0414	Neotropical	no_seed	New_World	95
CS0506	Neotropical	seed	New_World	49
CS0507	Neotropical	no_seed	New_World	15
RA0109	Neotropical	seed	New_World	76
RA0113	Neotropical	no_info	New_World	67
RA0116	Neotropical	no_info	New_World	41
RA0118	Neotropical	no_info	New_World	124
RA0128	Neotropical	no_info	New_World	42
RA0139	Nearctic	seed	New_World	70
RA0141	Nearctic	seed	New_World	73
RA0154	Neotropical	no_info	New_World	124
RA0162	Neotropical	no_seed	New_World	44
RA0163	Neotropical	no_info	New_World	36
RA0167	Neotropical	no_info	New_World	41
RA0168	Neotropical	no_info	New_World	50
RA0170	Neotropical	no_seed	New_World	75
RA0174	Neotropical	no_info	New_World	36
RA0175	Neotropical	no_info	New_World	97
RA0177	Neotropical	no_info	New_World	56
RA0179	Neotropical	seed	New_World	56
RA0180	Neotropical	no_info	New_World	63
RA0181	Neotropical	seed	New_World	49
RA0182	Neotropical	no_info	New_World	71
RA0183	Neotropical	no_info	New_World	110
RA0184	Neotropical	no_info	New_World	50
RA0185	Neotropical	seed	New_World	81
RA0195	Palearctic	seed	Old_World	91
RA0204	Nearctic	no_seed	New_World	9
RA0218	Nearctic	no_info	New_World	60
RA0314	Afrotropical	no_info	Old_World	119
RA0315	Afrotropical	no_info	Old_World	73
RA0316	Afrotropical	no_info	Old_World	77
RA0317	Afrotropical	no_info	Old_World	46
RA0318	Indomalaya	no_info	Old_World	75
RA0319	Indomalaya	no_info	Old_World	23
RA0320	Indomalaya	no_info	Old_World	74
RA0329	Australian	no_info	Old_World	47
RA0331	Nearctic	no_seed	New_World	93
RA0332	Nearctic	seed	New_World	17
RA0333	Nearctic	seed	New_World	49
RA0336	Nearctic	no_seed	New_World	44
RA0337	Nearctic	no_info	New_World	57
RA0357	Australian	no_info	Old_World	73
RA0380	Nearctic	seed	New_World	68
RA0422	Indomalaya	no_info	Old_World	110
RA0423	Indomalaya	no_info	Old_World	44
RA0447	Nearctic	no_seed	New_World	59
RA0448	Nearctic	seed	New_World	47
RA0450	Nearctic	no_seed	New_World	59
RA0456	Nearctic	no_seed	New_World	21
RA0461	Nearctic	no_seed	New_World	33
RA0462	Nearctic	seed	New_World	42
RA0465	Nearctic	seed	New_World	60
RA0466	Nearctic	seed	New_World	138
RA0467	Nearctic	seed	New_World	51
RA0468	Nearctic	seed	New_World	112
RA0471	Nearctic	no_seed	New_World	84
RA0473	Australian	no_info	Old_World	45
RA0477	Indomalaya	no_info	Old_World	74
RA0479	Indomalaya	no_info	Old_World	92
RA0480	Indomalaya	seed	Old_World	75
RA0482	Indomalaya	no_info	Old_World	8
RA0492	Indomalaya	no_info	Old_World	12
RA0494	Nearctic	seed	New_World	56
RA0516	Australian	no_info	Old_World	43
RA0518	Australian	no_info	Old_World	93
RA0519	Australian	no_info	Old_World	128
RA0520	Australian	no_info	Old_World	44
RA0526	Nearctic	no_seed	New_World	98
RA0527	Nearctic	no_seed	New_World	53
RA0528	Nearctic	no_info	New_World	102
RA0536	Afrotropical	no_info	Old_World	63
RA0538	Afrotropical	no_info	Old_World	89
RA0557	Afrotropical	no_info	Old_World	40
RA0558	Afrotropical	no_info	Old_World	15
RA0559	Afrotropical	no_info	Old_World	71
RA0563	Afrotropical	no_info	Old_World	51
RA0565	Neotropical	no_info	New_World	119
RA0567	Nearctic	no_seed	New_World	79
RA0568	Nearctic	no_info	New_World	72
RA0569	Neotropical	no_seed	New_World	4
RA0570	Nearctic	no_seed	New_World	121
RA0572	Nearctic	no_info	New_World	110
RA0573	Nearctic	seed	New_World	71
RA0574	Nearctic	seed	New_World	129
RA0576	Nearctic	seed	New_World	92
RA0577	Nearctic	no_seed	New_World	9
RA0578	Nearctic	no_info	New_World	133
RA0579	Nearctic	seed	New_World	84
RA0580	Nearctic	no_info	New_World	45
RA0605	Nearctic	seed	New_World	35
RA0606	Nearctic	no_info	New_World	7
RA0610	Nearctic	no_seed	New_World	58
RA0641	Nearctic	no_info	New_World	24
RA0707	Nearctic	seed	New_World	51
RA0709	Nearctic	seed	New_World	37
RA0710	Nearctic	seed	New_World	26
RA0712	Oceania	no_info	Old_World	36
RA0713	Oceania	no_seed	Old_World	106

## Sheet: Kruskal Wallis pairwise food
Table S8.1: Kruskal Wallis pairwise data for sample grouped for food resource.
Group 1	Group 2	H	p-value	q-value
no_info (n=52)	no_seed (n=23)	0.1269298523219957	0.72163675602901	0.72163675602901
no_info (n=52)	seed (n=31)	0.3408095652693506	0.5593622978652975	0.72163675602901
no_seed (n=23)	seed (n=31)	0.38580501186454974	0.5345127493662944	0.72163675602901

## Sheet: Kruskal Wallis pairwise region
Table S8.2: Kruskal Wallis pairwise data for sample grouped for region.
Group 1	Group 2	H	p-value	q-value
Afrotropical (n=10)	Australian (n=7)	0.0023838737949176203	0.9610588145527448	1.0
Afrotropical (n=10)	Indomalaya (n=10)	0.005722891566255789	0.9396977188193295	1.0
Afrotropical (n=10)	Nearctic (n=47)	0.011009060401536354	0.9164360595297205	1.0
Afrotropical (n=10)	Neotropical (n=29)	0.01657017271079663	0.8975751081215008	1.0
Afrotropical (n=10)	Oceania (n=2)	0.0	1.0	1.0
Afrotropical (n=10)	Palearctic (n=1)	1.6000000000000014	0.20590321073206447	1.0
Australian (n=7)	Indomalaya (n=10)	0.0597434545774036	0.8069018813241157	1.0
Australian (n=7)	Nearctic (n=47)	0.0026537791781194977	0.9589152735557191	1.0
Australian (n=7)	Neotropical (n=29)	0.0015993034145155155	0.968100068930593	1.0
Australian (n=7)	Oceania (n=2)	0.08571428571428541	0.7696979437812901	1.0
Australian (n=7)	Palearctic (n=1)	0.4285714285714306	0.5126907602619224	1.0
Indomalaya (n=10)	Nearctic (n=47)	0.0397427080495198	0.8419844858098521	1.0
Indomalaya (n=10)	Neotropical (n=29)	0.08391200710207476	0.7720643535880916	1.0
Indomalaya (n=10)	Oceania (n=2)	0.18591549295774581	0.6663380847253242	1.0
Indomalaya (n=10)	Palearctic (n=1)	0.9082568807339435	0.3405773429430215	1.0
Nearctic (n=47)	Neotropical (n=29)	0.020844850054904187	0.8852024170958583	1.0
Nearctic (n=47)	Oceania (n=2)	0.010215893271714651	0.919491953741621	1.0
Nearctic (n=47)	Palearctic (n=1)	0.6893256596807573	0.40639384358449415	1.0
Neotropical (n=29)	Oceania (n=2)	0.025914315569479637	0.8721097518041808	1.0
Neotropical (n=29)	Palearctic (n=1)	0.7520053475935826	0.3858420676389923	1.0
Oceania (n=2)	Palearctic (n=1)	0.0	1.0	1.0

## Sheet: Kruskal Wallis pairwise Old_New
Table S8.3: Kruskal Wallis pairwise data for sample grouped for Old World and New World.
Group 1	Group 2	H	p-value	q-value
New_World (n=76)	Old_World (n=30)	0.0020788379541075066	0.9636336319555273	0.9636336319555273

## Sheet: Observed OTU core
Figure S8.4: Number of observed OTU for each sample for 'core' microbiota.
id	Region	Food Resource	New_Old	observed_otus
RA0155	Neotropical	seed	New_World	11
CS0224	Nearctic	seed	New_World	13
CS0399	Neotropical	no_seed	New_World	15
RA0109	Neotropical	seed	New_World	13
RA0113	Neotropical	no_info	New_World	12
RA0116	Neotropical	no_info	New_World	14
RA0118	Neotropical	no_info	New_World	15
RA0139	Nearctic	seed	New_World	15
RA0141	Nearctic	seed	New_World	14
RA0154	Neotropical	no_info	New_World	15
RA0175	Neotropical	no_info	New_World	15
RA0182	Neotropical	no_info	New_World	13
RA0185	Neotropical	seed	New_World	15
RA0218	Nearctic	no_info	New_World	12
RA0314	Afrotropical	no_info	Old_World	15
RA0315	Afrotropical	no_info	Old_World	11
RA0320	Indomalaya	no_info	Old_World	14
RA0331	Nearctic	no_seed	New_World	12
RA0337	Nearctic	no_info	New_World	15
RA0357	Australian	no_info	Old_World	14
RA0422	Indomalaya	no_info	Old_World	13
RA0450	Nearctic	no_seed	New_World	10
RA0468	Nearctic	seed	New_World	15
RA0471	Nearctic	no_seed	New_World	14
RA0477	Indomalaya	no_info	Old_World	14
RA0479	Indomalaya	no_info	Old_World	14
RA0494	Nearctic	seed	New_World	13
RA0518	Australian	no_info	Old_World	15
RA0519	Australian	no_info	Old_World	11
RA0526	Nearctic	no_seed	New_World	10
RA0528	Nearctic	no_info	New_World	12
RA0536	Afrotropical	no_info	Old_World	11
RA0538	Afrotropical	no_info	Old_World	13
RA0563	Afrotropical	no_info	Old_World	7
RA0565	Neotropical	no_info	New_World	15
RA0567	Nearctic	no_seed	New_World	10
RA0568	Nearctic	no_info	New_World	15
RA0570	Nearctic	no_seed	New_World	14
RA0572	Nearctic	no_info	New_World	13
RA0573	Nearctic	seed	New_World	12
RA0574	Nearctic	seed	New_World	11
RA0576	Nearctic	seed	New_World	11
RA0578	Nearctic	no_info	New_World	13
RA0579	Nearctic	seed	New_World	11
RA0610	Nearctic	no_seed	New_World	13

## Sheet: Kruskal Wallis core pair food
Table S8.5: Kruskal Wallis pairwise data for sample grouped for food resource for 'core' microbiota.
Group 1	Group 2	H	p-value	q-value
no_info (n=25)	no_seed (n=8)	1.878964378801033	0.1704518995315873	0.4569192485024488
no_info (n=25)	seed (n=12)	0.8981172954800192	0.34328703549801964	0.4569192485024488
no_seed (n=8)	seed (n=12)	0.5534308029950855	0.4569192485024488	0.4569192485024488

## Sheet: Kruskal Wallis core pair region
Table S8.6: Kruskal Wallis pairwise data for sample grouped for region for 'core' microbiota.
Group 1	Group 2	H	p-value	q-value
Afrotropical (n=5)	Australian (n=3)	0.8506329113924058	0.3563733518637905	0.6212540380396783
Afrotropical (n=5)	Indomalaya (n=4)	1.9105263157894752	0.16690480637428295	0.4829855574277093
Afrotropical (n=5)	Nearctic (n=22)	0.7308114129037784	0.39262030437835416	0.6212540380396783
Afrotropical (n=5)	Neotropical (n=11)	3.4037780401416713	0.06504727505030214	0.32523637525151067
Australian (n=3)	Indomalaya (n=4)	0.03804347826086957	0.8453558603597902	0.8453558603597902
Australian (n=3)	Nearctic (n=22)	0.4606636435615121	0.49731398173235297	0.6212540380396783
Australian (n=3)	Neotropical (n=11)	0.34121518212427293	0.5591286342357105	0.6212540380396783
Indomalaya (n=4)	Nearctic (n=22)	1.6930893655336567	0.19319422297108374	0.4829855574277093
Indomalaya (n=4)	Neotropical (n=11)	0.565068493150685	0.4522252477010099	0.6212540380396783
Nearctic (n=22)	Neotropical (n=11)	4.2865726684576	0.03841452881904845	0.32523637525151067

## Sheet: Kruskal Wallis core pair OldNew
Table S8.7: Kruskal Wallis pairwise data for sample grouped for Old World and New World for 'core' microbiota.
Group 1	Group 2	H	p-value	q-value
New_World (n=33)	Old_World (n=12)	0.09856262833676616	0.7535614022634531	0.7535614022634531
