# Supplementary material for: Influence of host phylogeny, geographical location and seed harvesting diet on the bacterial community of globally distributed Pheidole ants
Source: PeerJ. 2020 Feb 4;8:e8492. doi: 10.7717/peerj.8492 (PMC7006521; doi:10.7717/peerj.8492)
Supplement: Table S9 — Kruskal Wallis pairwise data for sample grouped for food resource. S9.2: regions. S9.3: Old World and New World samples. S9.4: Faith’s Phylogenetic Diversity for all sample and categories analyzed for ‘core’. S9.5: Kruskal Wallis pairwise data for sample grouped for food resource. S9.6: regions. S9.7: Old World and New World category. [file peerj-08-8492-s011.xlsx]

## Sheet: Faith's PD
Table S9: Faith’s Phylogenetic Diversity for all sample and categories analyzed.
id	Region	Food Resource	New_Old	faith_pd
RA0155	Neotropical	seed	New_World	5.4133641885
CS0161	Nearctic	seed	New_World	9.4234655165
CS0224	Nearctic	seed	New_World	11.5325615585
CS0267	Nearctic	seed	New_World	2.3145224465
CS0301	Nearctic	no_seed	New_World	8.9770255445
CS0399	Neotropical	no_seed	New_World	10.2160461045
CS0410	Neotropical	no_seed	New_World	8.4530989035
CS0414	Neotropical	no_seed	New_World	10.6659383885
CS0506	Neotropical	seed	New_World	4.6142635745
CS0507	Neotropical	no_seed	New_World	2.4895472105
RA0109	Neotropical	seed	New_World	9.0227946415
RA0113	Neotropical	no_info	New_World	10.890482466
RA0116	Neotropical	no_info	New_World	7.4355438995
RA0118	Neotropical	no_info	New_World	8.5362906245
RA0128	Neotropical	no_info	New_World	3.8489707925
RA0139	Nearctic	seed	New_World	5.1175238845
RA0141	Nearctic	seed	New_World	5.8843623155
RA0154	Neotropical	no_info	New_World	13.0400384105
RA0162	Neotropical	no_seed	New_World	4.7260712825
RA0163	Neotropical	no_info	New_World	3.7772802895
RA0167	Neotropical	no_info	New_World	4.0232606735
RA0168	Neotropical	no_info	New_World	4.7319723395
RA0170	Neotropical	no_seed	New_World	10.0724065825
RA0174	Neotropical	no_info	New_World	6.5501233425
RA0175	Neotropical	no_info	New_World	9.3110174735
RA0177	Neotropical	no_info	New_World	7.3382428205
RA0179	Neotropical	seed	New_World	6.2851169015
RA0180	Neotropical	no_info	New_World	7.1432544745
RA0181	Neotropical	seed	New_World	8.0767801675
RA0182	Neotropical	no_info	New_World	8.6190433125
RA0183	Neotropical	no_info	New_World	9.9867168675
RA0184	Neotropical	no_info	New_World	5.1231072345
RA0185	Neotropical	seed	New_World	6.2233690205
RA0195	Palearctic	seed	Old_World	7.4056592395
RA0204	Nearctic	no_seed	New_World	1.7856734945
RA0218	Nearctic	no_info	New_World	6.9076429955
RA0314	Afrotropical	no_info	Old_World	12.830878909
RA0315	Afrotropical	no_info	Old_World	5.8868324505
RA0316	Afrotropical	no_info	Old_World	7.2796825505
RA0317	Afrotropical	no_info	Old_World	4.6991461115
RA0318	Indomalaya	no_info	Old_World	6.4607538525
RA0319	Indomalaya	no_info	Old_World	2.8414570685
RA0320	Indomalaya	no_info	Old_World	7.8385277155
RA0329	Australian	no_info	Old_World	3.9847939675
RA0331	Nearctic	no_seed	New_World	6.8310063185
RA0332	Nearctic	seed	New_World	7.7837637635
RA0333	Nearctic	seed	New_World	5.2207984175
RA0336	Nearctic	no_seed	New_World	7.4444431395
RA0337	Nearctic	no_info	New_World	6.5090035255
RA0357	Australian	no_info	Old_World	6.4955863055
RA0380	Nearctic	seed	New_World	6.0475969055
RA0422	Indomalaya	no_info	Old_World	8.7687169575
RA0423	Indomalaya	no_info	Old_World	4.5406459505
RA0447	Nearctic	no_seed	New_World	4.7698841835
RA0448	Nearctic	seed	New_World	3.9695341385
RA0450	Nearctic	no_seed	New_World	4.6266471065
RA0456	Nearctic	no_seed	New_World	2.9133268135
RA0461	Nearctic	no_seed	New_World	3.4610340155
RA0462	Nearctic	seed	New_World	4.2807048145
RA0465	Nearctic	seed	New_World	5.0377581855
RA0466	Nearctic	seed	New_World	11.3067282615
RA0467	Nearctic	seed	New_World	5.4163527715
RA0468	Nearctic	seed	New_World	8.1223734035
RA0471	Nearctic	no_seed	New_World	9.4150910635
RA0473	Australian	no_info	Old_World	3.7233023025
RA0477	Indomalaya	no_info	Old_World	11.023002582
RA0479	Indomalaya	no_info	Old_World	11.6217664255
RA0480	Indomalaya	seed	Old_World	7.3417305335
RA0482	Indomalaya	no_info	Old_World	1.3412682495
RA0492	Indomalaya	no_info	Old_World	1.7491089115
RA0494	Nearctic	seed	New_World	5.2020076005
RA0516	Australian	no_info	Old_World	4.1236248435
RA0518	Australian	no_info	Old_World	9.9001234755
RA0519	Australian	no_info	Old_World	11.1508141835
RA0520	Australian	no_info	Old_World	4.7734763455
RA0526	Nearctic	no_seed	New_World	11.391301562
RA0527	Nearctic	no_seed	New_World	6.3043335975
RA0528	Nearctic	no_info	New_World	9.3764667975
RA0536	Afrotropical	no_info	Old_World	5.3972345065
RA0538	Afrotropical	no_info	Old_World	6.4782675095
RA0557	Afrotropical	no_info	Old_World	4.9275667225
RA0558	Afrotropical	no_info	Old_World	2.6178237835
RA0559	Afrotropical	no_info	Old_World	6.0588784185
RA0563	Afrotropical	no_info	Old_World	5.8742710575
RA0565	Neotropical	no_info	New_World	14.5399299425
RA0567	Nearctic	no_seed	New_World	12.983624218
RA0568	Nearctic	no_info	New_World	5.8078866615
RA0569	Neotropical	no_seed	New_World	1.0093720375
RA0570	Nearctic	no_seed	New_World	14.0590513175
RA0572	Nearctic	no_info	New_World	12.5320723685
RA0573	Nearctic	seed	New_World	6.4976208305
RA0574	Nearctic	seed	New_World	10.3659366235
RA0576	Nearctic	seed	New_World	7.1926400995
RA0577	Nearctic	no_seed	New_World	2.1790002145
RA0578	Nearctic	no_info	New_World	13.1674193215
RA0579	Nearctic	seed	New_World	6.8748445355
RA0580	Nearctic	no_info	New_World	6.0060630885
RA0605	Nearctic	seed	New_World	4.6324000585
RA0606	Nearctic	no_info	New_World	0.8250197345
RA0610	Nearctic	no_seed	New_World	5.9771605205
RA0641	Nearctic	no_info	New_World	6.4895712535
RA0707	Nearctic	seed	New_World	5.3423670375
RA0709	Nearctic	seed	New_World	3.8831345855
RA0710	Nearctic	seed	New_World	3.3958980615
RA0712	Oceania	no_info	Old_World	5.3592708335
RA0713	Oceania	no_seed	Old_World	15.820820536

## Sheet: Kurskal Wallis food
Table S9.1: Kruskal Wallis pairwise data for sample grouped for food resource.
Group 1	Group 2	H	p-value	q-value
no_info (n=52)	no_seed (n=23)	0.029704277415959268	0.863162937035466	0.863162937035466
no_info (n=52)	seed (n=31)	0.2584190003545075	0.6112084090094464	0.863162937035466
no_seed (n=23)	seed (n=31)	0.26630116027030226	0.6058238475671237	0.863162937035466

## Sheet: Kruskal Wallis region
Table S9.2: Kruskal Wallis pairwise data for sample grouped for region.
Group 1	Group 2	H	p-value	q-value
Afrotropical (n=10)	Australian (n=7)	0.15238095238095184	0.6962703401140232	0.9417497169333409
Afrotropical (n=10)	Indomalaya (n=10)	0.09142857142856542	0.7623688184698474	0.9417497169333409
Afrotropical (n=10)	Nearctic (n=47)	0.2130594277329294	0.6443799513828786	0.9417497169333409
Afrotropical (n=10)	Neotropical (n=29)	1.4162068965517278	0.23402873960431148	0.9366093046899175
Afrotropical (n=10)	Oceania (n=2)	0.41538461538461746	0.5192490622486554	0.9366093046899175
Afrotropical (n=10)	Palearctic (n=1)	1.6000000000000014	0.20590321073206447	0.9366093046899175
Australian (n=7)	Indomalaya (n=10)	0.0	1.0	1.0
Australian (n=7)	Nearctic (n=47)	0.306548770378555	0.5798057600461395	0.9366093046899175
Australian (n=7)	Neotropical (n=29)	0.738516841965108	0.3901364011057509	0.9366093046899175
Australian (n=7)	Oceania (n=2)	1.37142857142857	0.24156658696896968	0.9366093046899175
Australian (n=7)	Palearctic (n=1)	0.4285714285714306	0.5126907602619224	0.9366093046899175
Indomalaya (n=10)	Nearctic (n=47)	0.04402054292003754	0.8338153972060769	0.9727846300737564
Indomalaya (n=10)	Neotropical (n=29)	0.3734482758620743	0.5411306360028818	0.9366093046899175
Indomalaya (n=10)	Oceania (n=2)	0.7384615384615429	0.39015414830192485	0.9366093046899175
Indomalaya (n=10)	Palearctic (n=1)	0.10000000000000142	0.7518296340458476	0.9417497169333409
Nearctic (n=47)	Neotropical (n=29)	0.8164095625577943	0.3662320210724027	0.9366093046899175
Nearctic (n=47)	Oceania (n=2)	0.8272340425531866	0.363073555726947	0.9366093046899175
Nearctic (n=47)	Palearctic (n=1)	0.3764654798089282	0.5395009484108078	0.9366093046899175
Neotropical (n=29)	Oceania (n=2)	0.5237068965517295	0.46926469466771004	0.9366093046899175
Neotropical (n=29)	Palearctic (n=1)	0.0033370411568398595	0.9539341219435828	1.0
Oceania (n=2)	Palearctic (n=1)	0.0	1.0	1.0

## Sheet: Kruskal Wallis Old New
Table S9.3: Kruskal Wallis pairwise data for sample grouped for Old World and New World.
Group 1	Group 2	H	p-value	q-value
New_World (n=76)	Old_World (n=30)	0.44392523364479075	0.5052339713880762	0.5052339713880762

## Sheet: Faith's PD core
Table S9.4: Faith’s Phylogenetic Diversity for all sample and categories analysed.
id	Region	Food Resource	New_Old	faith_pd
RA0155	Neotropical	seed	New_World	1.7987224465
CS0224	Nearctic	seed	New_World	1.8381664205
CS0399	Neotropical	no_seed	New_World	2.0192416075
RA0109	Neotropical	seed	New_World	1.8333294105
RA0113	Neotropical	no_info	New_World	1.8617992005
RA0116	Neotropical	no_info	New_World	2.0192416025
RA0118	Neotropical	no_info	New_World	2.0192416075
RA0139	Nearctic	seed	New_World	2.0192416075
RA0141	Nearctic	seed	New_World	1.8381664255
RA0154	Neotropical	no_info	New_World	2.0192416075
RA0175	Neotropical	no_info	New_World	2.0192416075
RA0182	Neotropical	no_info	New_World	1.8332673255
RA0185	Neotropical	seed	New_World	2.0192416075
RA0218	Nearctic	no_info	New_World	1.8617992055
RA0314	Afrotropical	no_info	Old_World	2.0192416075
RA0315	Afrotropical	no_info	Old_World	2.0046063825
RA0320	Indomalaya	no_info	Old_World	2.0143425075
RA0331	Nearctic	no_seed	New_World	1.5846818795
RA0337	Nearctic	no_info	New_World	2.0192416075
RA0357	Australian	no_info	Old_World	2.0143425025
RA0422	Indomalaya	no_info	Old_World	2.0192415965
RA0450	Nearctic	no_seed	New_World	1.9650034255
RA0468	Nearctic	seed	New_World	2.0192416075
RA0471	Nearctic	no_seed	New_World	2.0143425025
RA0477	Indomalaya	no_info	Old_World	2.0144045925
RA0479	Indomalaya	no_info	Old_World	2.0192416025
RA0494	Nearctic	seed	New_World	1.8666983055
RA0518	Australian	no_info	Old_World	2.0192416075
RA0519	Australian	no_info	Old_World	1.9120785895
RA0526	Nearctic	no_seed	New_World	1.9353576515
RA0528	Nearctic	no_info	New_World	1.9797976235
RA0536	Afrotropical	no_info	Old_World	1.9797976185
RA0538	Afrotropical	no_info	Old_World	1.9846967285
RA0563	Afrotropical	no_info	Old_World	1.7542203695
RA0565	Neotropical	no_info	New_World	2.0192416075
RA0567	Nearctic	no_seed	New_World	1.8272543215
RA0568	Nearctic	no_info	New_World	2.0192416075
RA0570	Nearctic	no_seed	New_World	2.0192416015
RA0572	Nearctic	no_info	New_World	1.9846967285
RA0573	Nearctic	seed	New_World	1.9846967185
RA0574	Nearctic	seed	New_World	1.8872698255
RA0576	Nearctic	seed	New_World	1.8872698255
RA0578	Nearctic	no_info	New_World	2.0094434025
RA0579	Nearctic	seed	New_World	1.8872698255
RA0610	Nearctic	no_seed	New_World	1.9979560195

## Sheet: Kurskal Wallis core food
Table S9.5: Kruskal Wallis pairwise data for sample grouped for food resource.
Group 1	Group 2	H	p-value	q-value
no_info (n=25)	no_seed (n=8)	1.9030882102030326	0.16773305703163705	0.2515995855474556
no_info (n=25)	seed (n=12)	3.5141437271619993	0.06084709138320673	0.1825412741496202
no_seed (n=8)	seed (n=12)	0.2541635005065781	0.6141585670393863	0.6141585670393863

## Sheet: Kurskal Wallis core region
Table S9.6: Kruskal Wallis pairwise data for sample grouped for region.
Group 1	Group 2	H	p-value	q-value
Afrotropical (n=5)	Australian (n=3)	0.35983935742971757	0.5485954657999343	0.6857443322499179
Afrotropical (n=5)	Indomalaya (n=4)	2.1599999999999966	0.14164469029513294	0.6850001745527906
Afrotropical (n=5)	Nearctic (n=22)	0.11876345739772827	0.7303795084281557	0.8115327871423952
Afrotropical (n=5)	Neotropical (n=11)	0.7867132867132991	0.3750958093399851	0.6850001745527906
Australian (n=3)	Indomalaya (n=4)	0.5	0.47950012218695337	0.6850001745527906
Australian (n=3)	Nearctic (n=22)	1.1032656663724667	0.2935505424697202	0.6850001745527906
Australian (n=3)	Neotropical (n=11)	0.006911217437535044	0.9337452042152725	0.9337452042152725
Indomalaya (n=4)	Nearctic (n=22)	3.171746666250278	0.07492228144599368	0.6850001745527906
Indomalaya (n=4)	Neotropical (n=11)	0.5510496183206107	0.4578891375705829	0.6850001745527906
Nearctic (n=22)	Neotropical (n=11)	1.0145548346751982	0.3138141089477128	0.6850001745527906

## Sheet: Kurskal Wallis core Old New
Table S9.7: Kruskal Wallis pairwise data for sample grouped for Old World and New World.
Group 1	Group 2	H	p-value	q-value
New_World (n=33)	Old_World (n=12)	0.5845704305770073	0.4445264135677337	0.4445264135677337
